# Supplementary material for: Hydraulic Tomography for Estimating the Diffusivity of Heterogeneous Aquifers Based on Groundwater Response to Tidal Fluctuation in an Artificial Island in Taiwan
Source: Hindawi journal article supplement (doi:10.1155/2018/6046258), 2018-01-01
Supplement: f1 [file 6046258.f1.pdf]

Supplementary Material for

**Hydraulic Tomography for Estimating the Diffusivity of Heterogeneous **Aquifers****

**Based on Groundwater Response to Tidal **Fluctuation** in **an Artificial Island in****

**Taiwan**

Jet-Chau Wen<sup>1, 2</sup>, Hong-Ru Lin<sup>3</sup>, Tian-Chyi Jim Yeh<sup>4</sup>, Yu-Li Wang<sup>4</sup>, Keng-Li Lin<sup>5</sup>, and  
Shao-Yang Huang<sup>2, \*</sup>

<sup>1</sup> Department of Safety, Health and Environmental Engineering, National Yunlin  
University of Science and Technology, Douliou, Yunlin, Taiwan.

<sup>2</sup> Research Center for Soil and Water Resources and Natural Disaster Prevention,  
National Yunlin University of Science and Technology, Douliou, Yunlin, Taiwan.

<sup>3</sup> Doctoral Program, Graduate School of Engineering Science and Technology,  
National Yunlin University of Science and Technology, Douliou, Yunlin, Taiwan.

<sup>4</sup> Department of Hydrology and Atmospheric Sciences, University of Arizona, Tucson,  
AZ, USA.

<sup>5</sup> Department of Environment, AECOM Taiwan Corporation, Xitun, Taichung,  
Taiwan.

\*Corresponding author, e-mail: [syh1019@ntu.edu.tw](mailto:syh1019@ntu.edu.tw), Tel: 886-937-020761.

## Text S1: Long-term groundwater levels of the 55 observation wells

The long-term groundwater levels of the 55 observation wells are shown in Figure S1 (a ~ bc). The long-term groundwater levels of each observation well present a significant impact due to the precipitation recharge in May 2014. Moreover, the long-term groundwater levels of the observation wells ob03, ob09, ob24, ob39, and ob43 are affected the most by tidal fluctuation.

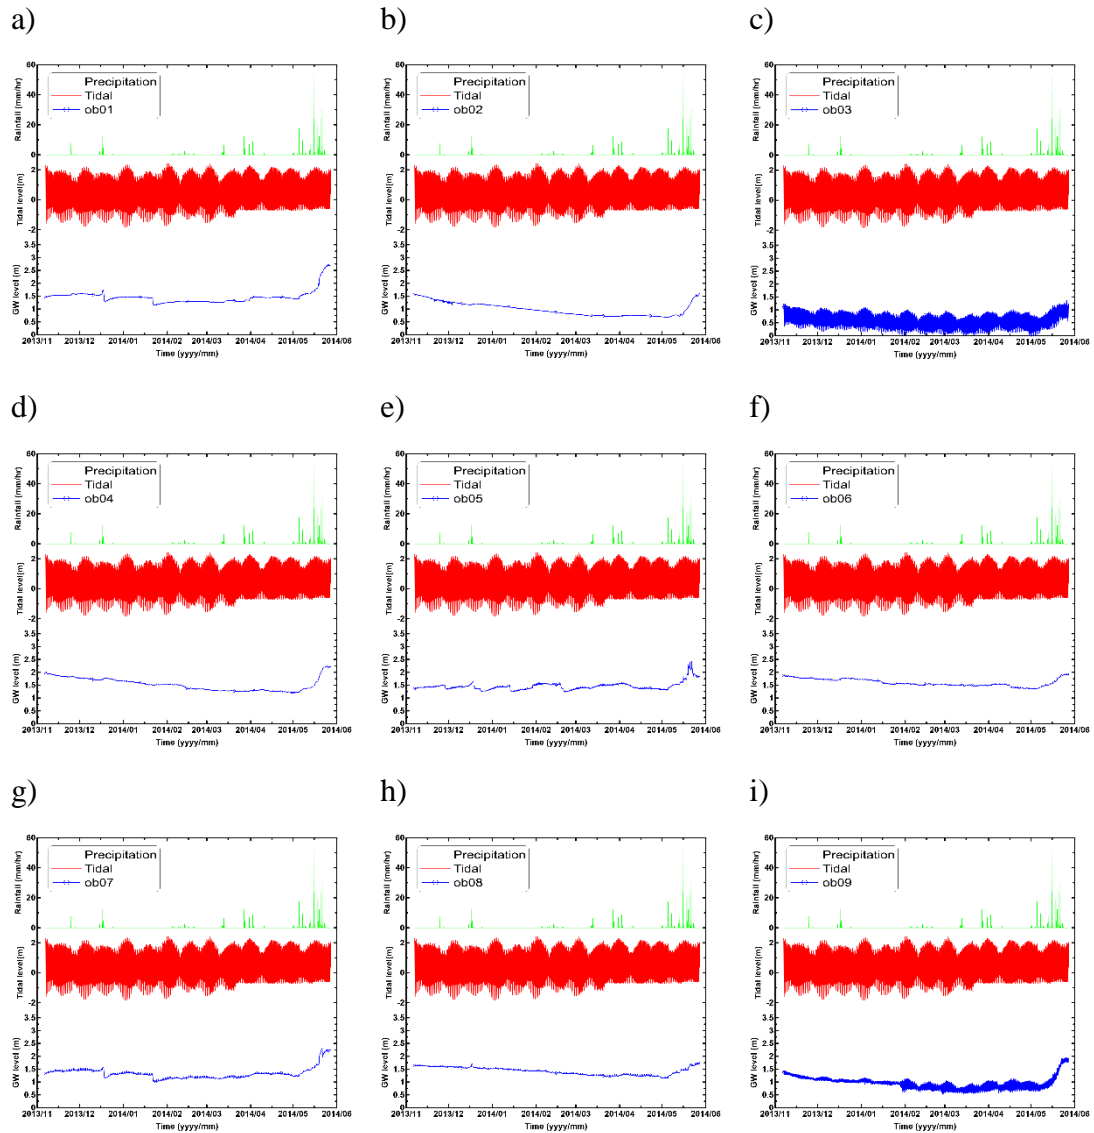

Figure 1 consists of three vertically stacked panels sharing a common x-axis representing time from 2013/11 to 2014/06. The top panel displays Rainfall (mm/hr) as green vertical bars, with peaks reaching up to 60 mm/hr. The middle panel shows Tidal level (m) as a red line oscillating between approximately -2 m and 2 m. The bottom panel shows GW level (m) as a blue line that starts at 2.0 m, decreases to a minimum of about 1.5 m in early 2014, and then rises back to 2.0 m by mid-2014.



ah)

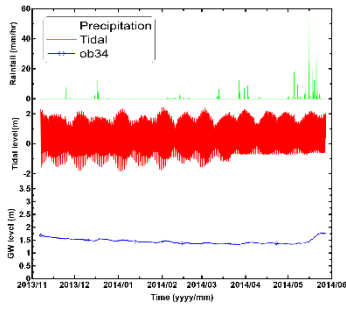

ai)

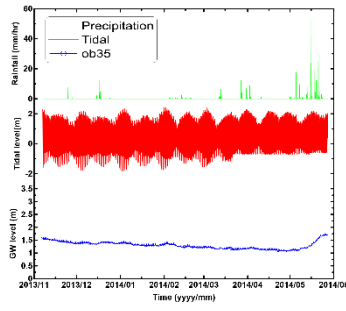

aj)

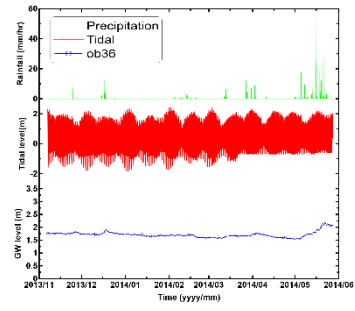

ak)

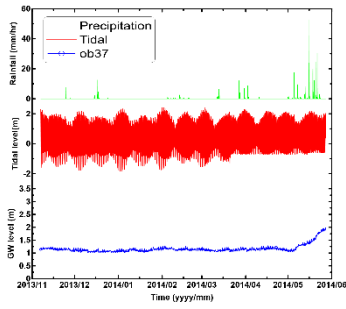

al)

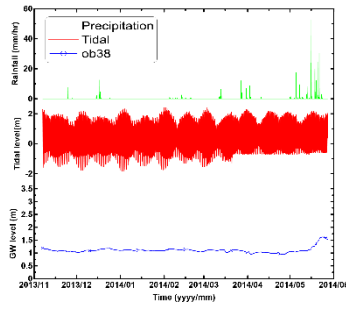

am)

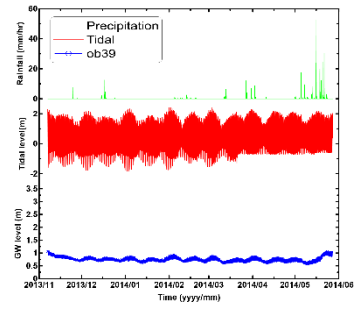

an)

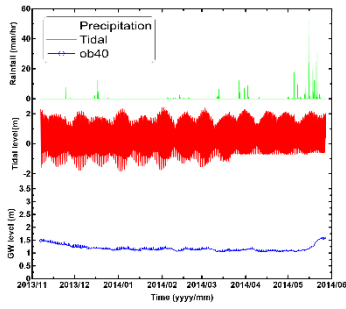

ao)

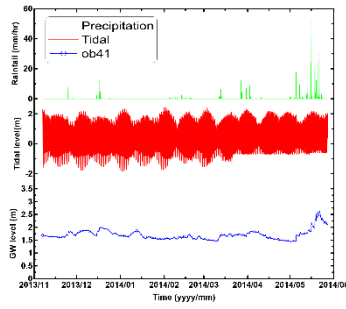

ap)

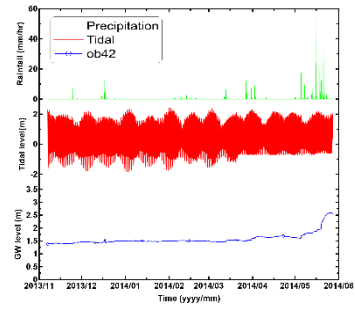

aq)

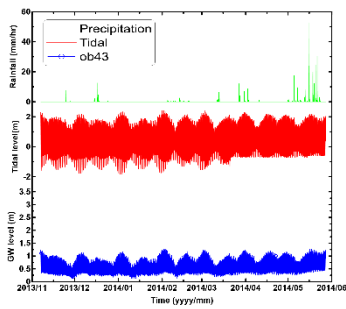

ar)

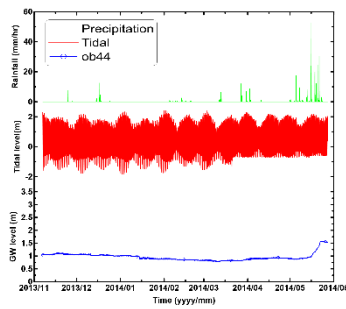

as)

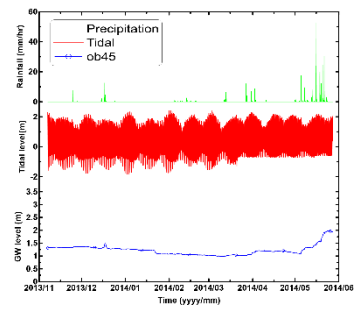

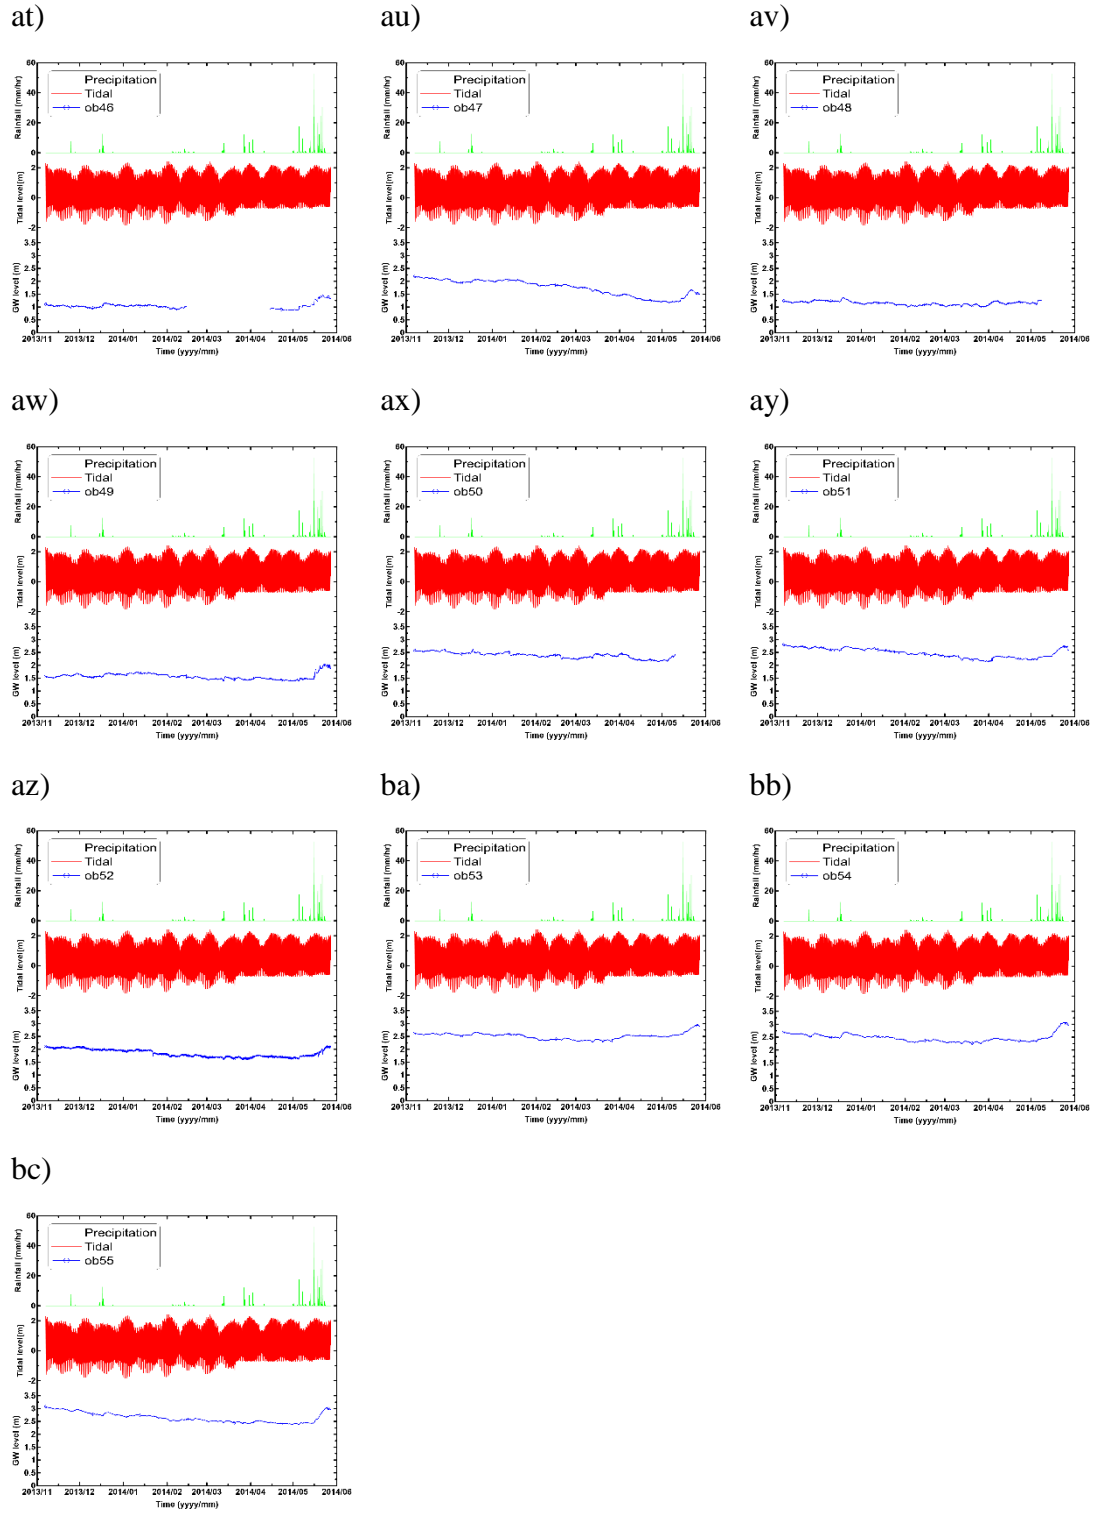

Figure S1(a ~ bc): Long-term rainfall, tidal and groundwater levels of each observation well during the period: 11/07/2013 ~ 05/27/2014.
